# Supplementary material
Source: PubMed Central journal article supplement (PMC2512262)
Supplement: NIHMS60699-supplement-Supplemental_T.pdf [file NIHMS60699-supplement-Supplemental_T.pdf]

## Supplementary Table 2 |

## Examples of protein interactions that have been visualized using the BiFC assay

| Category of proteins          | Features*                                | Protein partners**                                                                      | Organism                                                                                                  | References |
|-------------------------------|------------------------------------------|-----------------------------------------------------------------------------------------|-----------------------------------------------------------------------------------------------------------|------------|
| Peptides                      | Designed coiled coil                     | Anti-parallel NZ – CZ                                                                   | <i>Escherichia coli</i>                                                                                   | 42         |
|                               | Heat-shock proteins                      | Hsc70, HSP90 – TPR1, TPR2A, TPR2B                                                       | <i>E. coli</i>                                                                                            | 36         |
| Nuclear proteins              | bZIP domain                              | Fos – Jun – ATF2; BATF – Jun; Maf – Sox                                                 | Mammalian cells                                                                                           | 4,9,11     |
|                               | Rel domain                               | IκB – p65, p50 – p65                                                                    | Mammalian cells                                                                                           | 4          |
|                               | bHLHZIP domain                           | Myc/Max/ Mad family dimers Mist – Mist                                                  | Mammalian cells                                                                                           | 10,12      |
|                               | Bromodomain                              | AcH4 – Brd2; SPA-1, P-TEFb – Brd4                                                       | Mammalian cells                                                                                           | 13,14,16   |
|                               | SMAD family                              | AKT/PKB, SMAD4 – SMAD3                                                                  | Mammalian cells                                                                                           | 22         |
|                               | Interferon regulatory factor-family      | IRF8 – PU.1                                                                             | Mammalian cells                                                                                           | 17         |
|                               | Winged-helix domain                      | AcFKH1 – CPCR1                                                                          | <i>Acremonium chrysogenum</i>                                                                             | 43         |
| Ubiquitin-family proteins     | E3 ligase-substrate complexes            | Skp2 – Myc                                                                              | Mammalian cells                                                                                           | 18         |
|                               |                                          | Grr1 – Hof1                                                                             | <i>Saccharomyces cerevisiae</i>                                                                           | 20         |
|                               |                                          | ASK1 – EID1                                                                             | <i>Sinapsis alba</i> ,<br><i>Petroselinum crispum</i>                                                     | 23         |
|                               | Ubiquitin-family peptide conjugates      | Jun–Ub, Jun–SUMO1                                                                       | Mammalian cells                                                                                           | 35         |
| Signalling proteins           | MAPK network                             | MEKK3 – IκBα; MEKK2 – IκBβ; ERK1 – p65; ERK2 – p65                                      | Mammalian cells                                                                                           | 48         |
|                               | PKB and PDK kinases                      | AKT/PKB – hFt1, PDK1 – hFt1                                                             | Mammalian cells                                                                                           | 33         |
|                               | Heterotrimeric G proteins                | Gβ1 – Gγ7                                                                               | <i>Dictyostelium discoideum</i> ,<br>Mammalian cells                                                      | 24,28      |
|                               | Phospholipases                           | PLCβ2 – PLCδ1                                                                           | Mammalian cells                                                                                           | 25         |
|                               | Apoptosis regulators                     | Bif1 – Bax                                                                              | <i>Aspergillus nidulans</i>                                                                               | 29         |
|                               | Photosensitivity                         | FpsA – FpsA                                                                             |                                                                                                           | 49         |
| Enzyme complexes              | ACS                                      | Heteromeric interactions among ACS1, ASC4, ASC6, ACS7 and ACS8                          | <i>E. coli</i>                                                                                            | 50         |
|                               | Cytochrome P450                          | P450C2, P450E1 – P450 reductase                                                         | Mammalian cells                                                                                           | 26         |
| Membrane proteins             | Integrin signalling                      | Integrin αIIbβ3 – Src                                                                   | Mammalian cells                                                                                           | 19         |
|                               | ARF-family GTPases                       | Interactions of ARF1, 3, 4, 5 with GBF1                                                 | Mammalian cells                                                                                           | 21         |
|                               | Lectins                                  | MCFD2, Cathepsin – ERGIC53                                                              | Mammalian cells                                                                                           | 30         |
|                               | Cytokine receptors                       | gp130 – LIFR                                                                            | Mammalian cells                                                                                           | 27         |
| Nucleic acid-binding proteins | RNA binding                              | RNA binding by IMP, FMRP, STAU1, IRP1, PTB1; Nef – Nef; NXF1 – Y14                      | Mammalian cells                                                                                           | 31,51,59   |
|                               | DNA binding                              | Zif268, PBSII binding to DNA                                                            | <i>In vitro</i>                                                                                           | 32         |
| Plant proteins                | Transcription factors                    | FIE – MEA; bZIP63 – bZIP63; LSD1 – LSD1; bHLH1 – OFP1; SAD, BPBF – GAMYB; LIP19 – OBF19 | <i>Nicotiana benthamiana</i> ,<br><i>N. tabacum</i><br><i>Arabidopsis thaliana</i> ,<br><i>Allium sp.</i> | 15,52–55   |
|                               | Post-translational-modification proteins | PFTα–PFTβ; T143c–T143c                                                                  | <i>N. benthamiana</i> , <i>A. thaliana</i>                                                                | 52,53      |

|                 |                            |                                    |                                  |       |
|-----------------|----------------------------|------------------------------------|----------------------------------|-------|
|                 | Flowering regulators       | FD – FT                            | <i>N. benthamiana</i>            | 56    |
|                 | Plastid division           | MinD1 – MinE1; FtsZ1, ARC6 – FtsZ2 | <i>N. tabacum</i>                | 57    |
| Plant pathogens | Type IV secretion          | VirE2 – VirD4                      | <i>Agrobacterium tumefaciens</i> | 44,60 |
|                 | Host-pathogen interactions | VirE2, VirF, H2A – AtVIP, VirE3    | <i>Nicotiana tabacum</i>         | 45–47 |

\* Features of a specific category of proteins can include protein domains or protein functions. Abbreviations: bHLHZIP, basic helix–loop–helix zipper; BiFC, bimolecular fluorescence complementation; bZIP, basic-region leucine zipper; MAPK, mitogen-activated protein kinase; PKB, protein kinase B. \*\*Protein pairs that have been tested are separated by a dash. In cases where several protein pairs have been tested, the alternative partners are separated by a comma. Different combinations of proteins that have been tested are separated by semi-colons.
